# Supplementary material
Source: publisher site journal article supplement (http://content.karger.com/ProdukteDB/miscArchiv/000/200/018/Suppl.pdf)
Supplement: Supplementary file 1 [file Suppl.pdf]

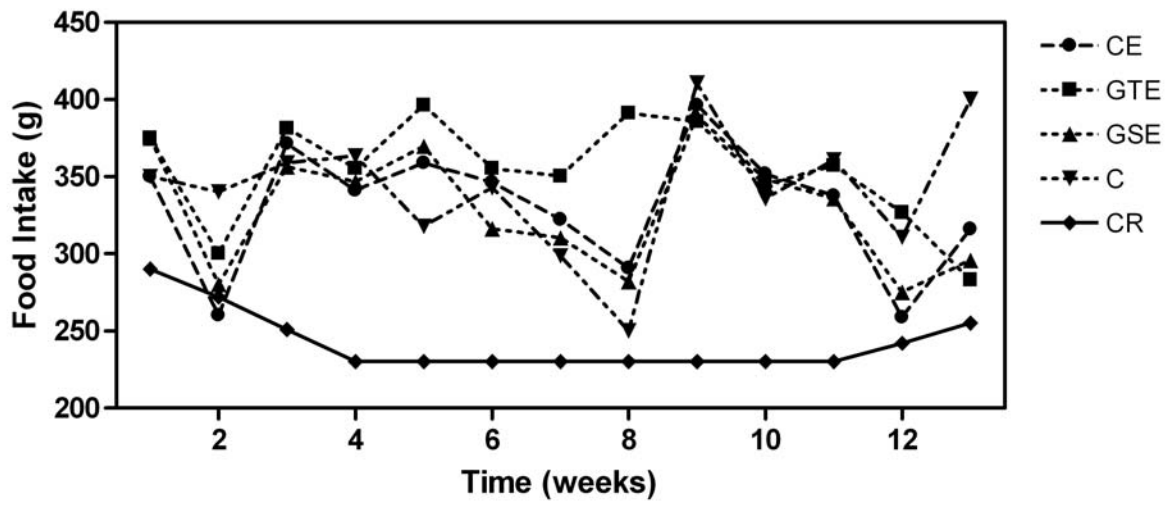

**Fig. 1.** Weekly food intake of beagles during the period of study with different extract supplementations (CE, GTE, GSE), control fed ad libitum (C) and caloric-restricted (CR). Values are the means of 4 dogs. Significance of the differences between groups (two-way ANOVA): effect of time  $p < 0.0001$  and effect of treatment  $p < 0.005$ .

**Table 4.** Gene expression changes in leukocytes of dogs with CE intake. Fold changes between 0 and 90 days are expressed in log<sub>2</sub> and fold diff (CE/C) indicates the difference between CE and C fold changes. P-values of both analyses are shown in the right column of the values. Only genes with fold diff ≥ 0.3 are shown.\* predicted genes.

| ENSEMBL ID              | GENE                                                             | Fold diff<br>(CE/C) | P-value | Fold<br>change<br>(0/90d) | P-value | GENE FUNCTION                              |
|-------------------------|------------------------------------------------------------------|---------------------|---------|---------------------------|---------|--------------------------------------------|
| <i>DOWN - REGULATED</i> |                                                                  |                     |         |                           |         |                                            |
| ENSCAFG00000013214      | * Glucose regulated protein. 58kDa (GRP 58) (ERp57) (PDIA3)      | -1.55               | 0.0013  | -0.49                     | 0.0004  | Antigen processing and presentation        |
| ENSCAFG00000003029      | Interleukin-8 precursor (IL-8)                                   | -0.59               | 0.0030  | -0.33                     | 0.0010  | Inflammatory response                      |
| ENSCAFG00000014175      | * Integrin alpha-4 precursor (VLA-4) (CD49d)                     | -0.54               | 0.0015  | -0.29                     | 0.0001  | Leukocyte adhesion                         |
| ENSCAFG00000014251      | * DEAD-box protein 3 (Helicase-like protein 2) (HLP2)            | -0.54               | 0.0040  | -0.24                     | 0.0006  | RNA processing                             |
| ENSCAFG00000009532      | K-Ras protein                                                    | -0.49               | 0.0002  | -0.35                     | 0.0000  | Cell growth                                |
| ENSCAFG00000009058      | Topoisomerase I                                                  | -0.46               | 0.0013  | -0.29                     | 0.0000  | DNA topology                               |
| ENSCAFG00000006153      | * B-cell translocation gene 1 protein (BTG-1 protein)            | -0.44               | 0.0001  | -0.14                     | 0.0019  | Antiproliferative. apoptosis               |
| ENSCAFG00000020196      | * 78 kDa glucose-regulated protein precursor (GRP 78)            | -0.37               | 0.0064  | -0.13                     | 0.0089  | Antigen processing and presentation        |
| ENSCAFG00000015421      | * Mitogen-activated protein kinase 1 (ERK-2)                     | -0.30               | 0.0022  | -0.25                     | 0.0000  | Signal transduction                        |
| <i>UP - REGULATED</i>   |                                                                  |                     |         |                           |         |                                            |
| ENSCAFG00000019138      | Mitogen-activated protein kinase kinase 2 (MAP2K2)               | 0.49                | 0.0085  | 0.21                      | 0.0096  | Signalling pathway                         |
| ENSCAFG00000018285      | * Kinesin 2 60/70kDa isoform 1                                   | 0.43                | 0.0016  | 0.16                      | 0.0187  | Organelles transport                       |
| ENSCAFG00000007034      | * Yamaguchi sarcoma viral (v-yes-1) oncogene homolog             | 0.43                | 0.0078  | -0.07                     | 0.0389  | Protein tyrosine kinase activity           |
| ENSCAFG00000005223      | Rab GDP dissociation inhibitor beta (Rab GDI beta) (GDI-2)       | 0.42                | 0.0087  | 0.25                      | 0.0007  | Inhibits GDP dissociation from Rab         |
| ENSCAFG00000007350      | * C19orf13 protein/alpha synuclein binding protein               | 0.40                | 0.0002  | 0.17                      | 0.0000  | Presynaptic protein                        |
| ENSCAFG00000008647      | * Transketolase (TK)                                             | 0.40                | 0.0013  | -0.06                     | 0.0149  | Links pentose phosphate-glycolytic pathway |
| ENSCAFG00000014749      | * Annexin VII isoform 2                                          | 0.38                | 0.0071  | -0.08                     | 0.0367  | Exocytosis                                 |
| ENSCAFG00000004201      | * Sodium-dep broad specificity neutral aa transporter (SLC1A5)   | 0.35                | 0.0042  | 0.10                      | 0.0289  | Aminoacid transport                        |
| ENSCAFG00000018670      | * Phosphoglucomutase 1 (Glucose phosphomutase 1) (PGM 1)         | 0.34                | 0.0006  | -0.06                     | 0.0132  | Glucose metabolism                         |
| ENSCAFG00000012916      | * Calgizzarin (S100 calcium-binding protein A11) (S100C protein) | 0.33                | 0.0028  | 0.07                      | 0.0019  | Calcium binding protein                    |

**Table 5.** Gene expression changes in leukocytes of dogs with GTE intake. Fold changes between 0 and 90 days are expressed in log<sub>2</sub> and fold diff (GTE/C) indicates the difference between GTE and C fold changes. P-values of both analyses are shown in the right column of the values. Only genes with fold diff ≥ 0.3 are shown.\* predicted genes.

| ENSEMBL ID              | GENE                                                                   | Fold diff<br>(GTE/C) | P-value | Fold change<br>(0/90d) | P-value | GENE FUNCTION              |
|-------------------------|------------------------------------------------------------------------|----------------------|---------|------------------------|---------|----------------------------|
| <i>DOWN - REGULATED</i> |                                                                        |                      |         |                        |         |                            |
| ENSCAFG00000005947      | * Zinc finger protein 268 (Zinc finger protein HZF3)                   | -0.33                | 0.0093  | -0.23                  | 0.0014  | Transcriptional regulation |
| ENSCAFG00000019100      | * Hypothetical protein FLJ20152                                        | -0.32                | 0.0030  | 0.17                   | 0.0003  | Unknown                    |
| <i>UP - REGULATED</i>   |                                                                        |                      |         |                        |         |                            |
| ENSCAFG00000018824      | * Flotillin-2 (Reggie-1) (REG-1)                                       | 0.52                 | 0.0033  | 0.27                   | 0.0000  | Epidermis development      |
| ENSCAFG00000001579      | Guanine nucleotide binding protein (G protein) (GNAQ)                  | 0.42                 | 0.0042  | 0.31                   | 0.0000  | Signalling transduction    |
| ENSCAFG00000015213      | * Signal transducer and activator of transcription 3 isoform 2 (STAT3) | 0.40                 | 0.0066  | 0.18                   | 0.0003  | Transcription activation   |
| ENSCAFG00000017622      | * Protein kinase C, beta type (PKC-B)                                  | 0.34                 | 0.0016  | 0.17                   | 0.0000  | Signal transduction        |

**Table 6.** Gene expression changes in leukocytes of dogs with GSE intake. Fold changes between 0 and 90 days are expressed in log<sub>2</sub> and fold diff (GSE/C) indicates the difference between GSE and C fold changes. P-values of both analyses are shown in the right column of the values. Only genes with fold diff ≥ 0.3 are shown.\* predicted genes.

| ENSEMBL ID            | GENE                                                     | Fold diff<br>(GSE/C) | P-value | Fold change<br>(0/90d) | P-value | GENE FUNCTION       |
|-----------------------|----------------------------------------------------------|----------------------|---------|------------------------|---------|---------------------|
| <i>UP - REGULATED</i> |                                                          |                      |         |                        |         |                     |
| ENSCAFG00000008647    | * Transketolase (TK)                                     | 0.40                 | 0.0017  | -0.06                  | 0.0496  | Pentose pathway     |
| ENSCAFG00000014749    | * Annexin VII isoform 2                                  | 0.39                 | 0.0039  | -0.07                  | 0.0278  | Exocytosis          |
| ENSCAFG00000007350    | * C19orf13 protein                                       | 0.33                 | 0.0003  | 0.10                   | 0.0002  | Presynaptic protein |
| ENSCAFG00000018670    | * Phosphoglucomutase 1 (Glucose phosphomutase 1) (PGM 1) | 0.30                 | 0.0095  | -0.10                  | 0.0439  | Glucose metabolism  |

**Table 7.** Gene expression changes in leukocytes of dogs with CR intake. Fold changes between 0 and 90 days are expressed in log<sub>2</sub> and fold diff (CR/C) indicates the difference between CR and C fold changes. P-values of both analyses are shown in the right column of the values. Only genes with fold diff ≥ 0.3 are shown.\* predicted genes.

| ENSEMBL ID                     | GENE                                                                                 | Fold diff<br>(CR/C) | P-value | Fold<br>change<br>(0/90d) | P-value | GENE FUNCTION                              |
|--------------------------------|--------------------------------------------------------------------------------------|---------------------|---------|---------------------------|---------|--------------------------------------------|
| <i><b>DOWN - REGULATED</b></i> |                                                                                      |                     |         |                           |         |                                            |
| ENSCAFG00000013214             | * Glucose regulated protein. 58kDa (GRP 58) (Erp57) (PDIA3)                          | -1.73               | 0.0053  | -0.64                     | 0.0235  | Antigen processing and presentation        |
| ENSCAFG00000014175             | * Integrin alpha-4 precursor (VLA-4) (CD49d)                                         | -0.51               | 0.0067  | -0.26                     | 0.0031  | Leukocyte adhesion                         |
| ENSCAFG00000000634             | * Small nuclear ribonucleoprotein polypeptide D2 (SNRPD2)                            | -0.49               | 0.0070  | -0.31                     | 0.0001  | Ribonucleoprotein                          |
| ENSCAFG00000000670             | GTP-binding nuclear protein Ran (GTPase Ran) (RAN)                                   | -0.49               | 0.0080  | -0.39                     | 0.0001  | Chromatin condensation and cell cycle      |
| ENSCAFG00000017648             | * ATP synthase alpha subunit (ATP5A1)                                                | -0.43               | 0.0044  | -0.27                     | 0.0008  | ATP synthesis                              |
| ENSCAFG00000000418             | Ubiquitin-protein ligase E3 Mdm2 (p53-binding protein Mdm2) (MDM2)                   | -0.41               | 0.0009  | -0.32                     | 0.0000  | Antiapoptosis                              |
| ENSCAFG00000012277             | * Cytochrome c oxidase subunit VIIc (COX7C)                                          | -0.37               | 0.0037  | -0.29                     | 0.0000  | Respiratory chain                          |
| ENSCAFG00000015340             | * Adenosine kinase isoform b (ADK)                                                   | -0.36               | 0.0025  | -0.30                     | 0.0000  | Phosphorylation of nucleosides             |
| ENSCAFG00000006545             | * SLC25A3 protein                                                                    | -0.35               | 0.0020  | -0.17                     | 0.0002  | Phosphate transport                        |
| ENSCAFG00000003507             | * Mitochondrial ribosomal protein L32 (MRPL32)                                       | -0.34               | 0.0046  | -0.28                     | 0.0000  | Transcription                              |
| ENSCAFG00000018324             | * THO complex subunit 1 (THOC1) (Nuclear matrix protein p84)                         | -0.32               | 0.0014  | -0.22                     | 0.0000  | Growth induction. apoptosis and DNA repair |
| ENSCAFG00000017798             | * Transcription factor-like protein MRGX (MORF4L2)                                   | -0.30               | 0.0016  | -0.21                     | 0.0000  | Unknown                                    |
| <i><b>UP - REGULATED</b></i>   |                                                                                      |                     |         |                           |         |                                            |
| ENSCAFG00000007034             | * Yamaguchi sarcoma viral (v-yes-1) oncogene homolog                                 | 0.72                | 0.0057  | 0.22                      | 0.0418  | Unknown                                    |
| ENSCAFG00000013904             | B-cell CLL/lymphoma 6 (zinc finger protein 51) (BCL6)                                | 0.70                | 0.0043  | 0.40                      | 0.0005  | Transcriptional repressor                  |
| ENSCAFG00000009795             | Na <sup>+</sup> /K <sup>+</sup> transporting ATPase alpha-1 chain precursor (ATP1A1) | 0.51                | 0.0021  | 0.27                      | 0.0000  | Na/K transport                             |
| ENSCAFG00000015213             | * Signal transducer and activator of transcription 3 isoform 2 (STAT3)               | 0.39                | 0.0097  | 0.17                      | 0.0002  | Transcription activator                    |
| ENSCAFG00000019363             | * Vacuolar ATP synthase 16 kDa proteolipid subunit (ATP6VOC)                         | 0.38                | 0.0071  | 0.17                      | 0.0050  | ATP synthesis                              |
| ENSCAFG00000002180             | * Semaphorin 4D (CD100) (SEMA4D)                                                     | 0.35                | 0.0028  | 0.12                      | 0.0019  | Immune system                              |
